# Supplementary material for: Predictive Proteomic Signature for the Prognosis of Cervical Cancer
Source: Research Square preprint supplement (doi:10.21203/rs.3.rs-327396/v1), 2021-08-24
Supplement: Supplementary file 1 [file 9b943d8cf07214df8d6601d8.xlsx]

## Sheet: Sheet1
Table4.Co-expressed proteins in a three-protein model
	Co-expressed proteins
BLC2	ACC-pS79, ACC1 , ACVRL1, αCATENIN, BRCA2, CASPASE3, CAVEOLIN1, CD49B, CKIT, CLAUDIN7, COLLAGENVI, CYCLINB1, ECADHERIN, ERα, FASN, FOXM1, LCK, MSH6, MYH11, PEA15, PI3KP85, PR, RICTOR, TFRC , X4EBP1
SMAD3	ACC-pS79, ATM, CD20, CD26, CJUN-pS73, COLLAGENVI, CYCLIND1, ERK2, ETS1, GAPDH, LKB1, MSH2, MTOR, NCADHERIN, PEA15, PEA15-pS116, RAB11, S6-pS235S236, S6-pS240S244, SHC-pY317, TAZ, 1433β ,1433δ
4EBP1-pT70	BAX, CYCLIND1, EEF2, ERK2, ETS1, GAPDH, JAB1, MYOSINIIA,NCADHERIN, PCADHERIN, PCNA, PEA15-pS116, PI3KP110α, RAD51, SHY-pY317, TFRC, 1433β , 1433ε,1433δ ,XRCC1
